# Supplementary material for: Nuclear receptor ERRα and transcription factor ERG form a reciprocal loop in the regulation of TMPRSS2:ERG fusion gene in prostate cancer
Source: PubMed Central journal article supplement (PMC6265259; doi:10.1038/s41388-018-0409-7), 2018-07-24
Supplement: 41388_2018_409_MOESM1_ESM.pdf [file 41388_2018_409_MOESM1_ESM.pdf]

**a**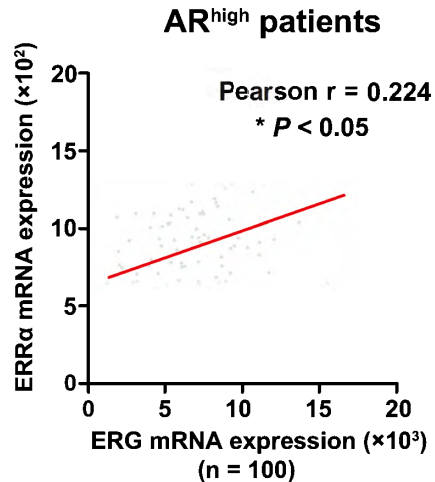**b**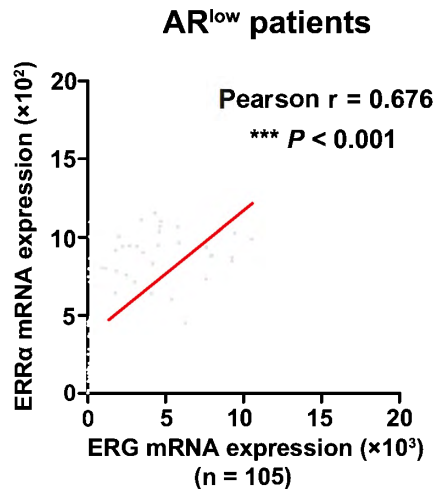**c**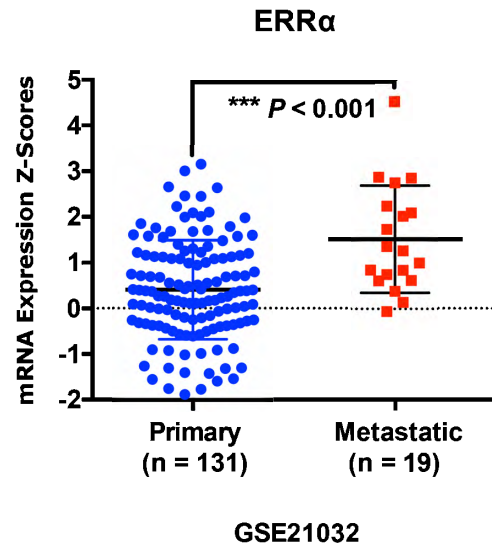**Supplementary Figure S1**

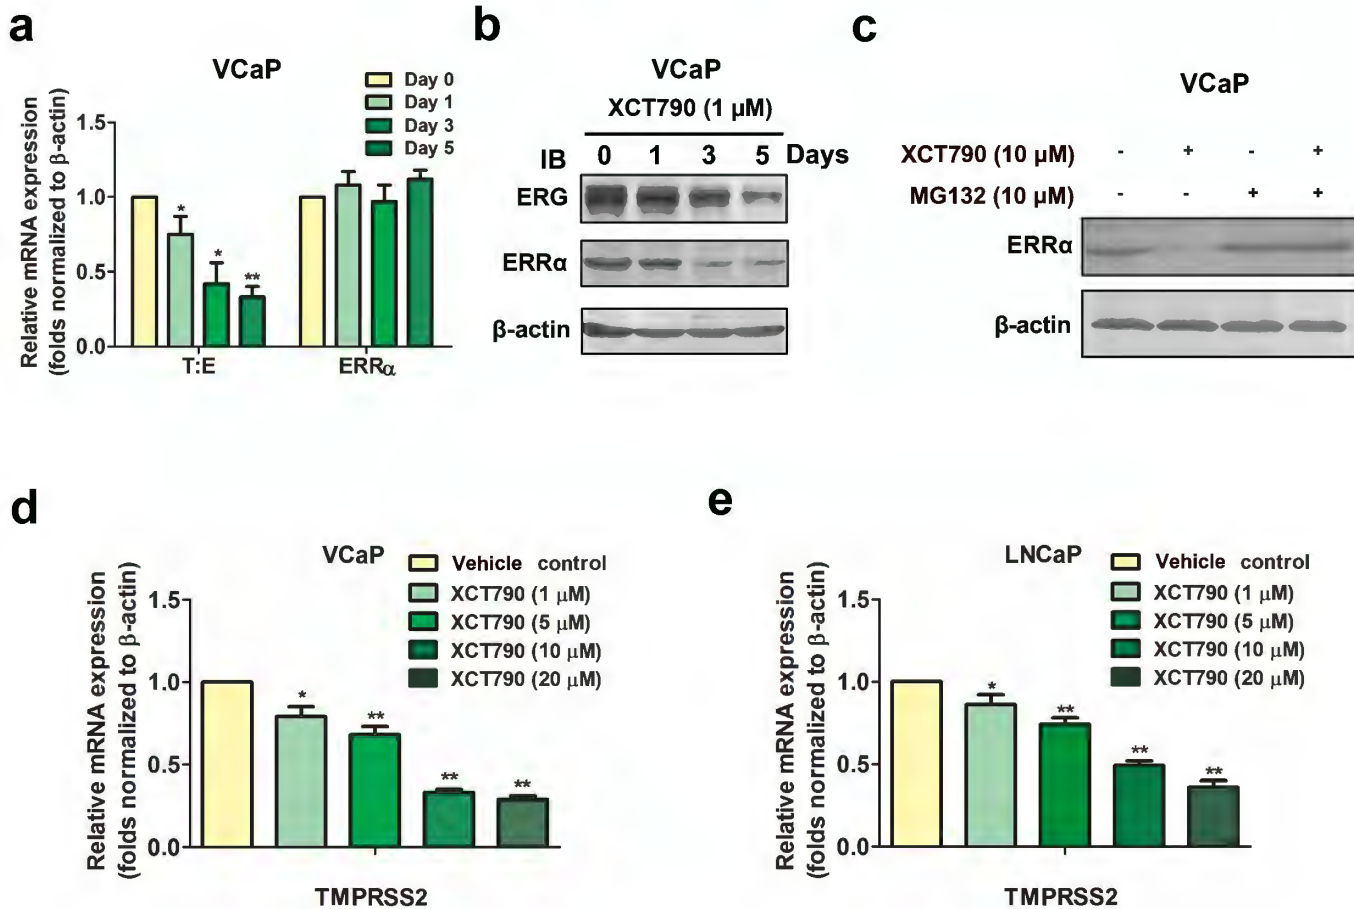

Supplementary Figure S2

**a**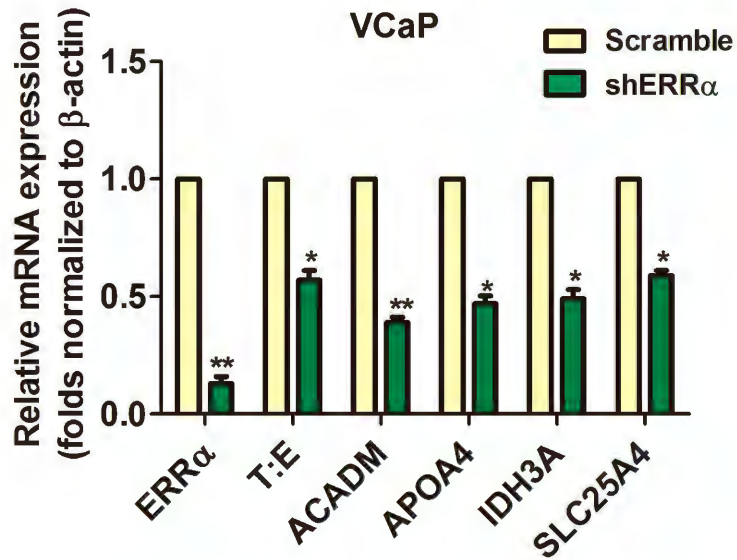**b**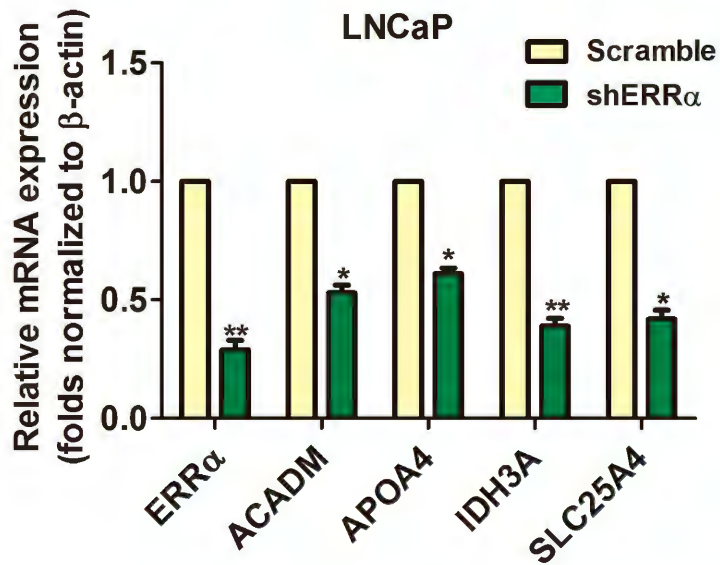**c**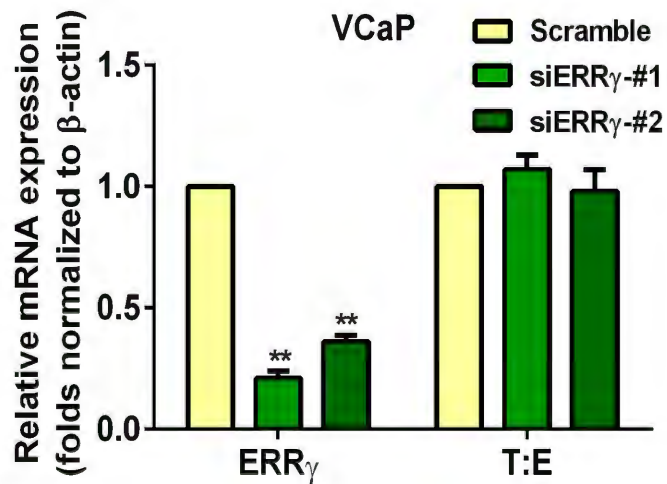**Supplementary Figure S3**

**a**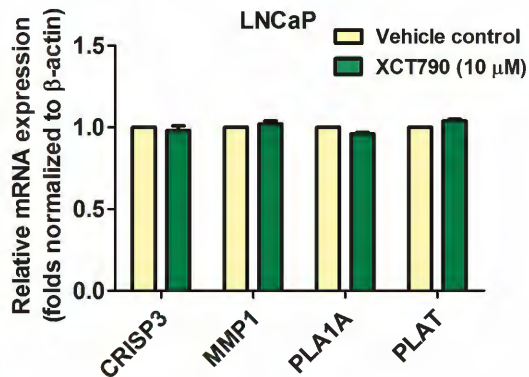**b**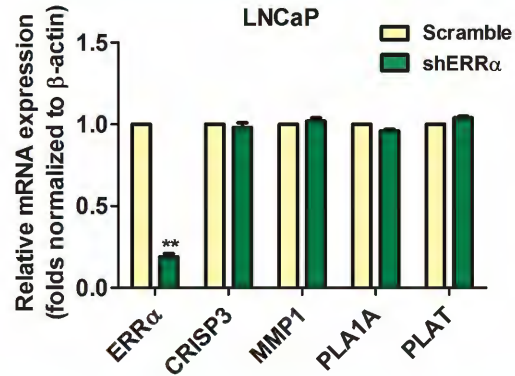**c**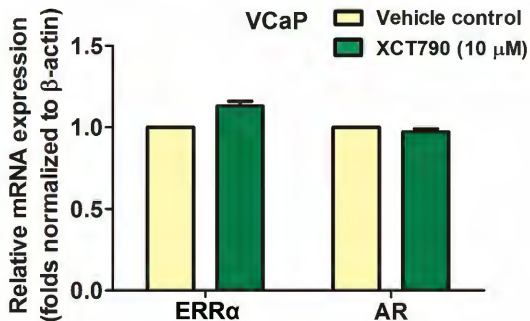**d**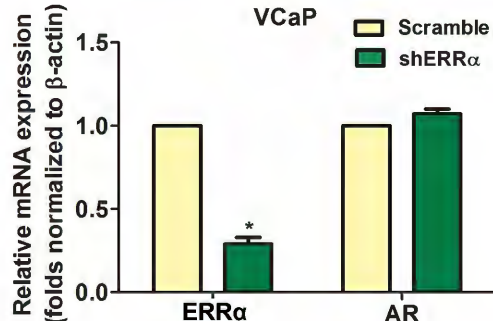**Supplementary Figure S4**

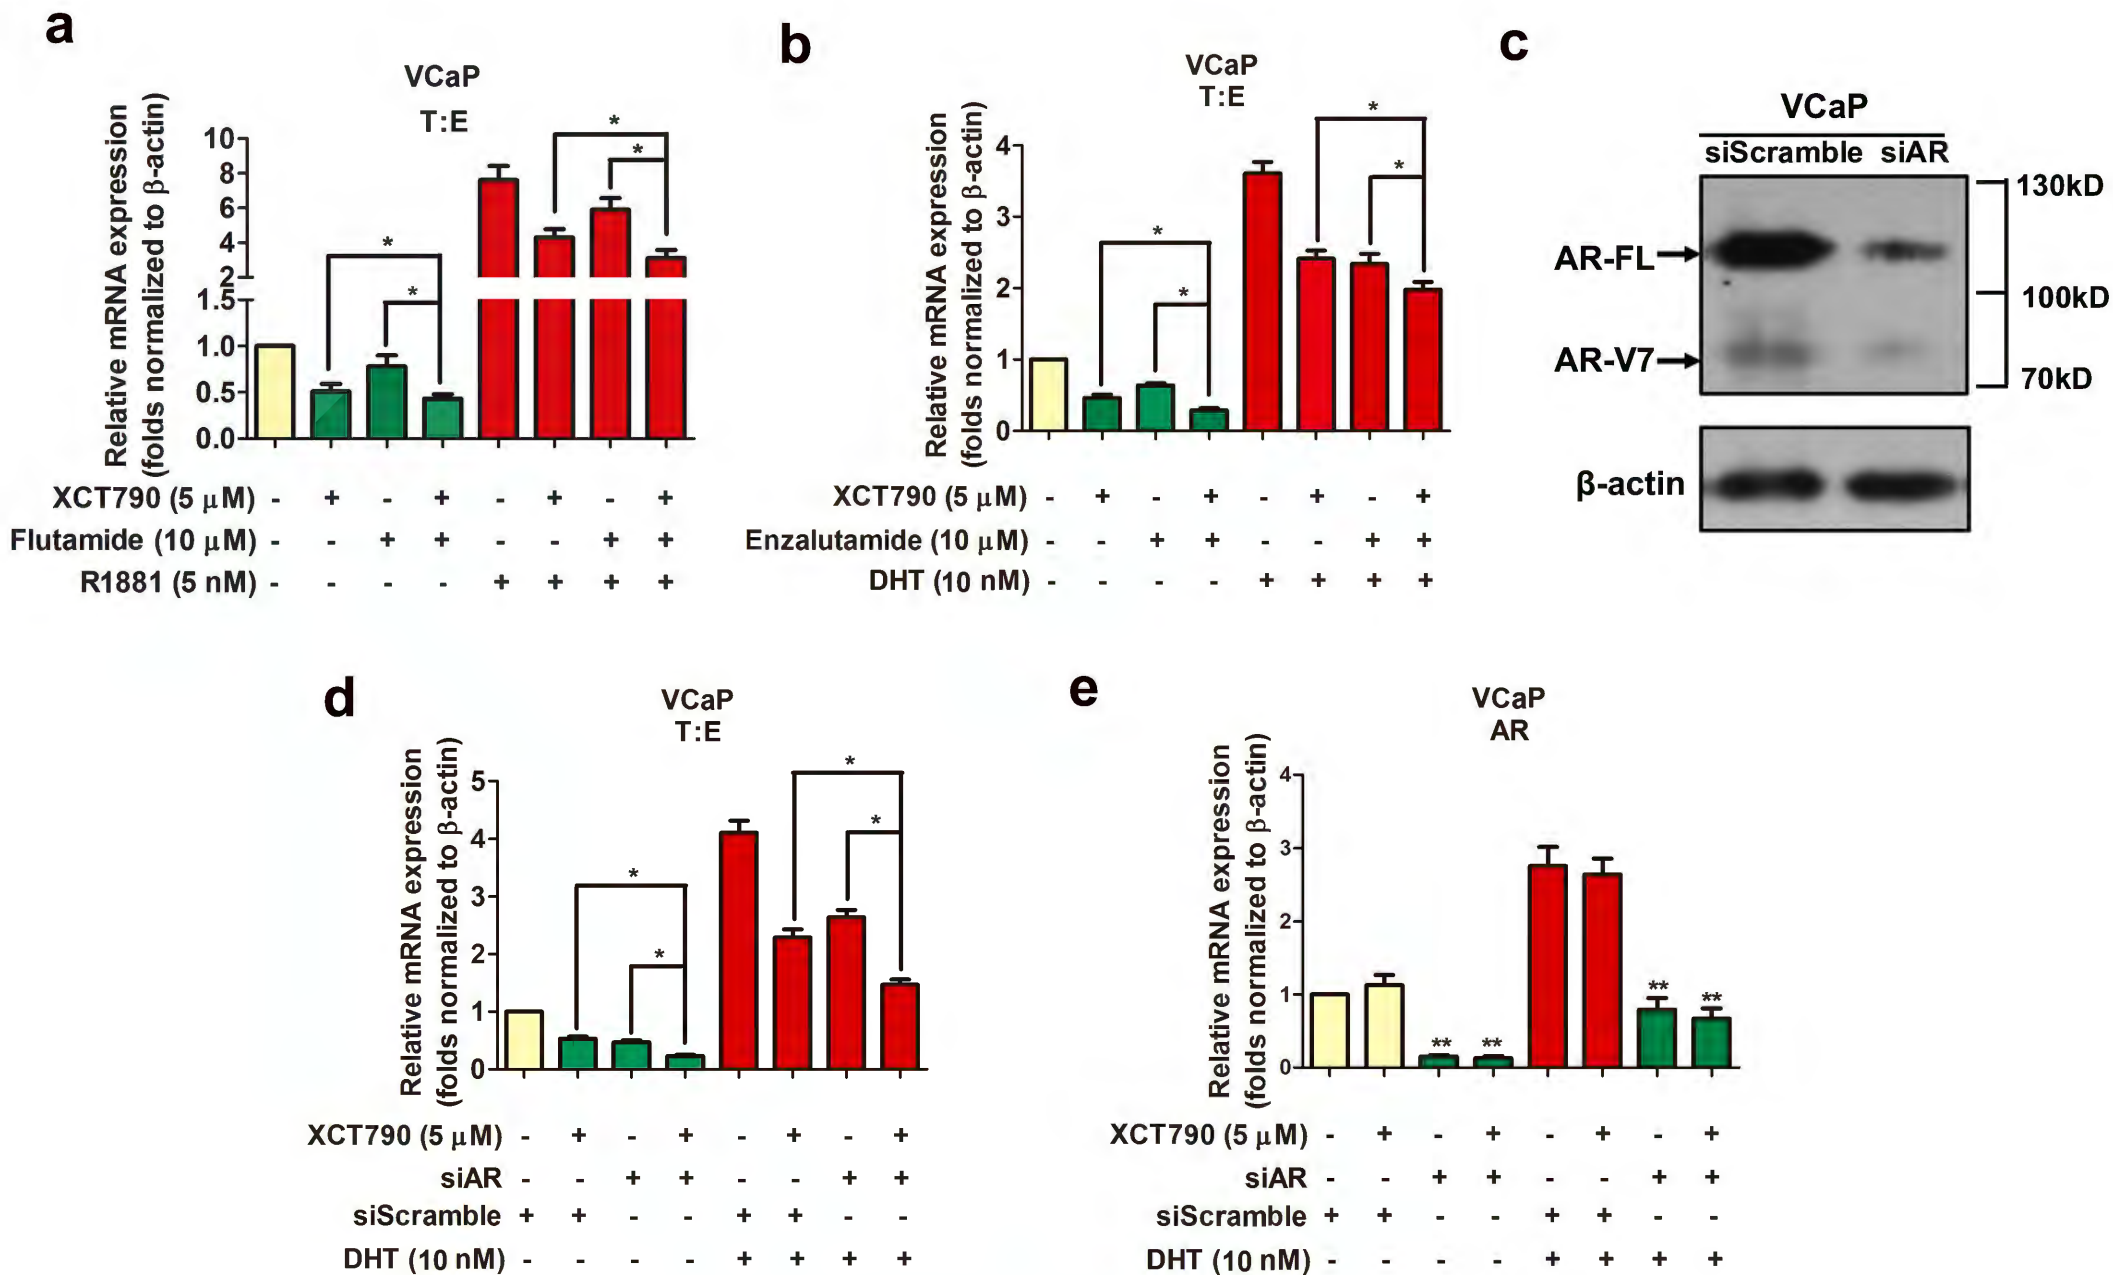

Supplementary Figure S5

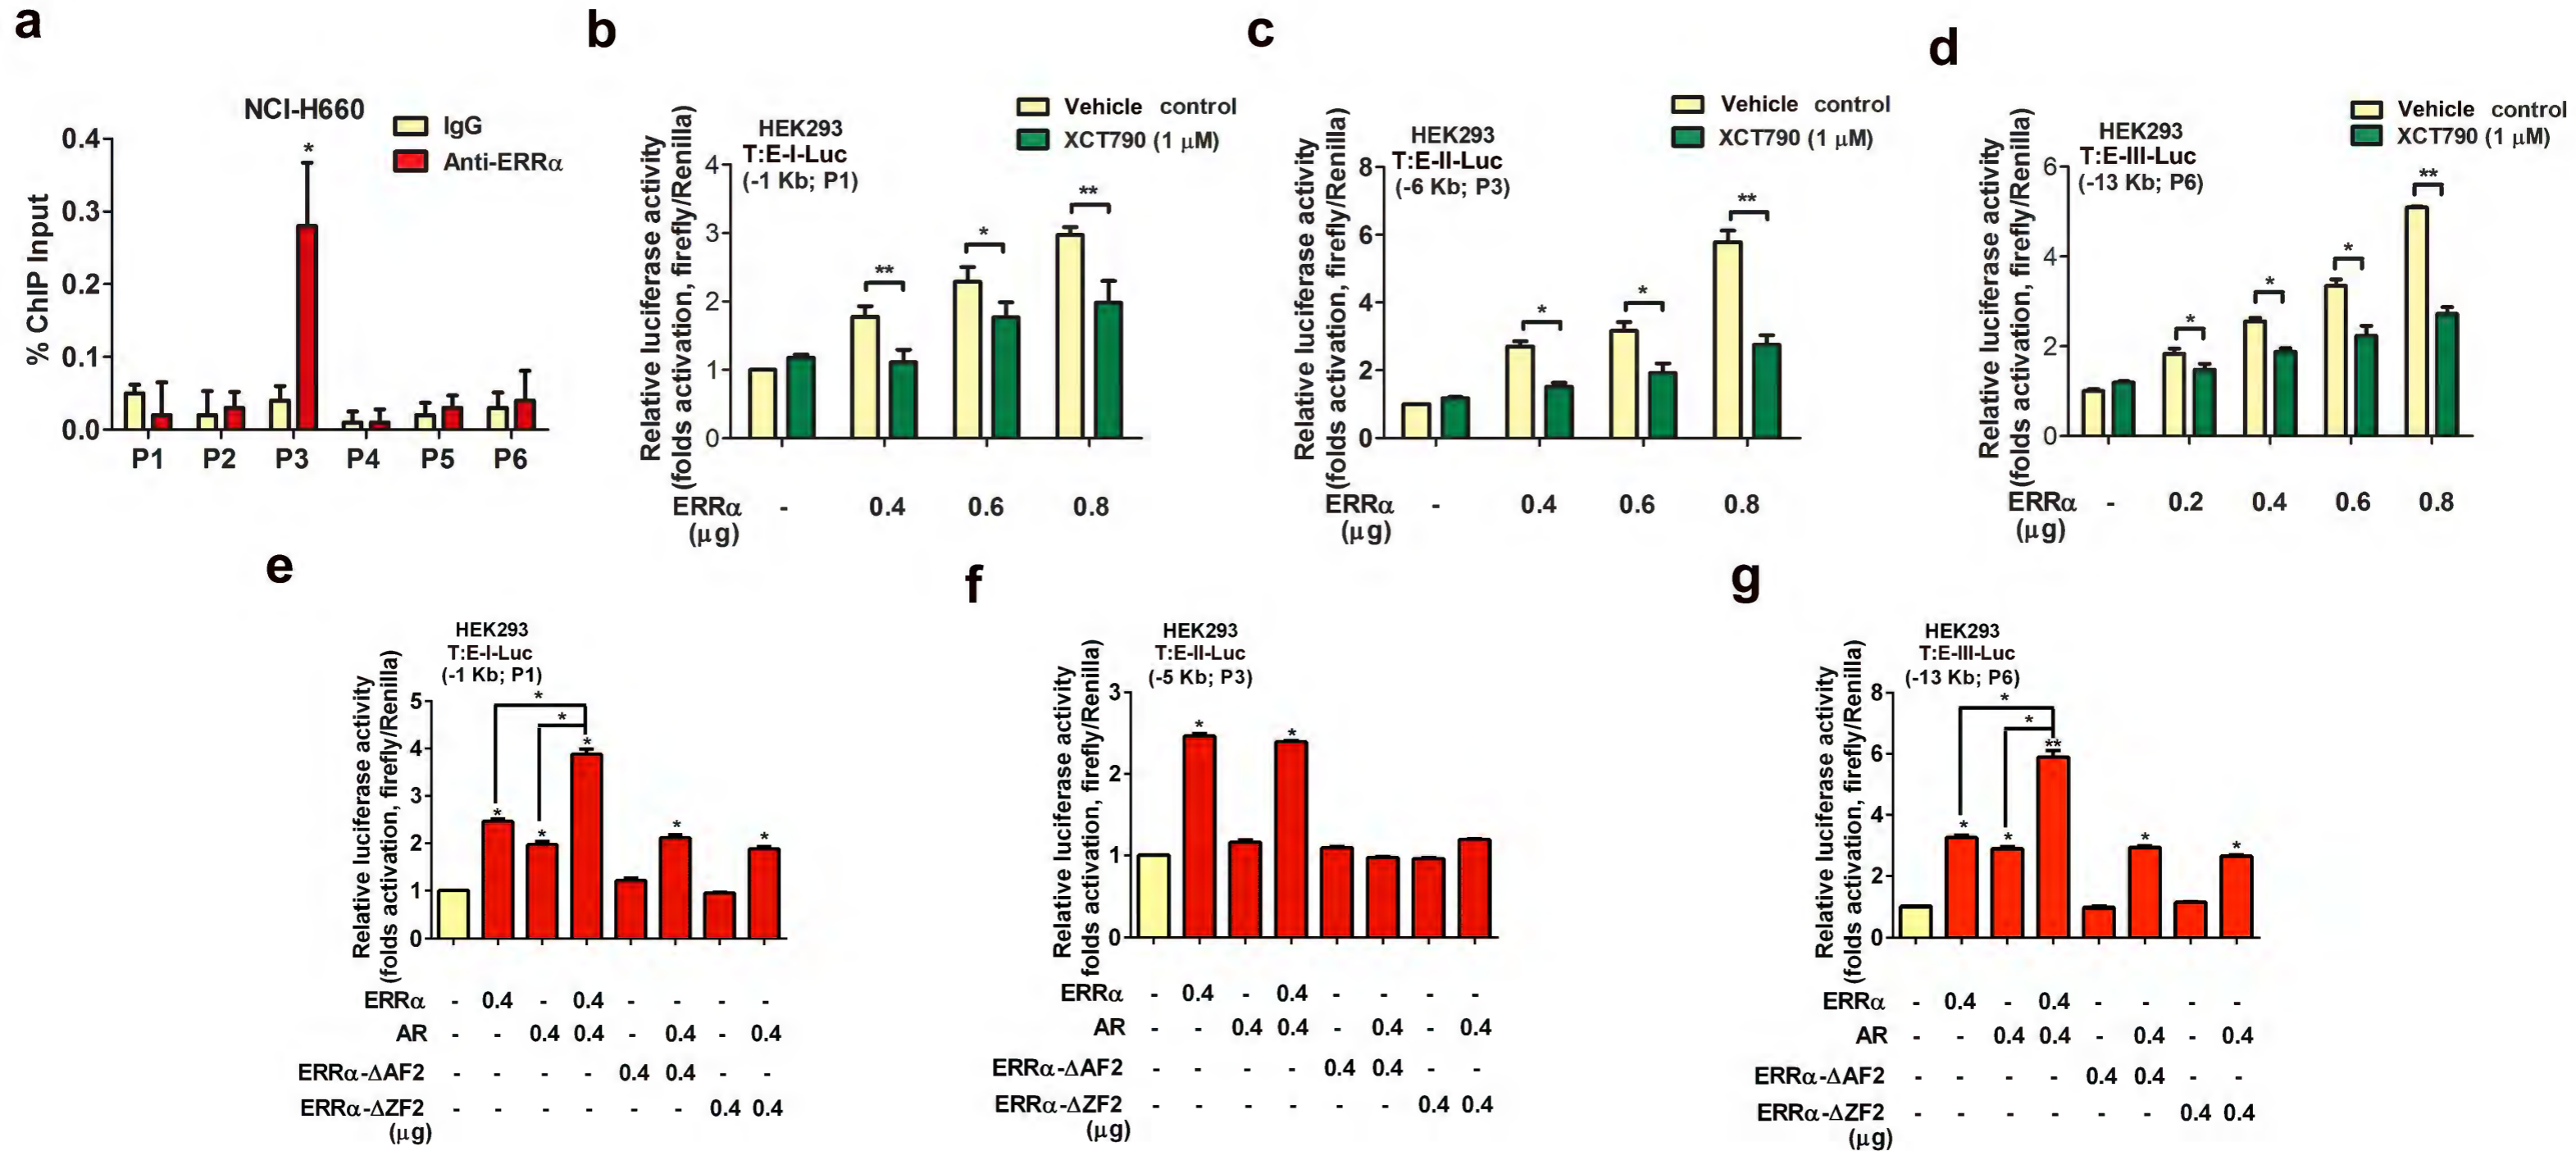

Supplementary Figure S6

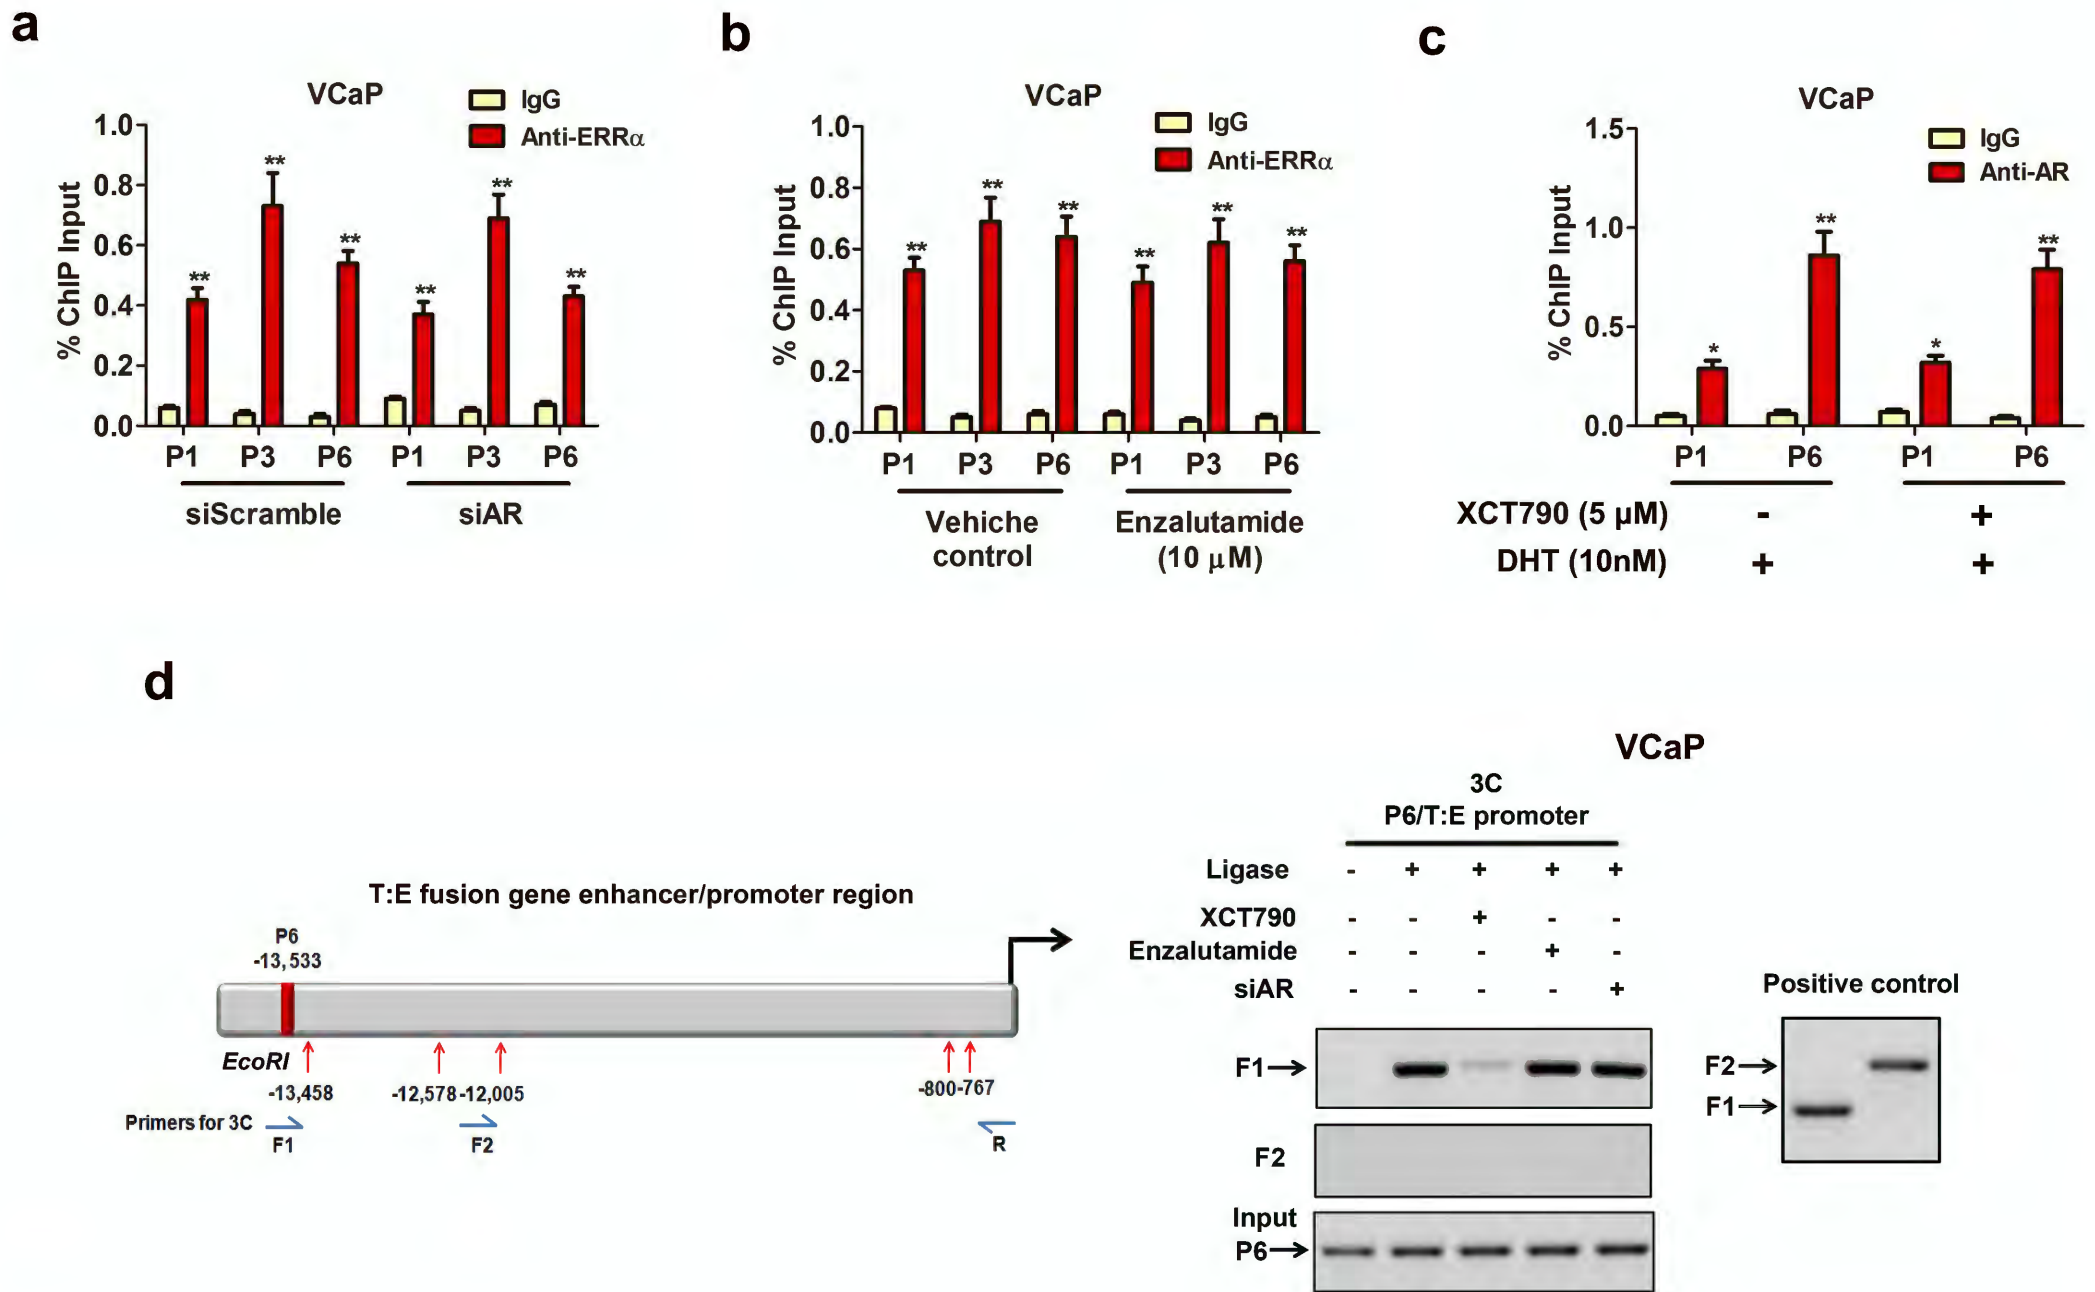

Supplementary Figure S7

**a**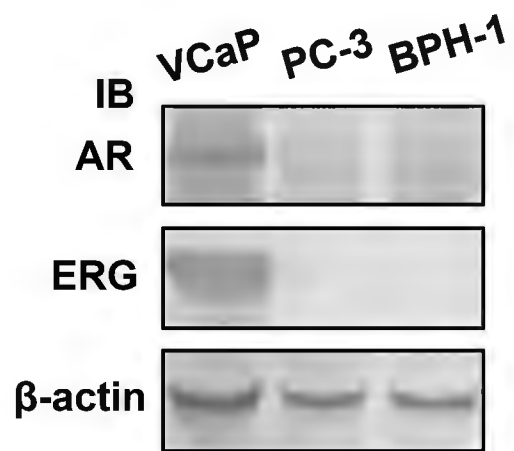**b**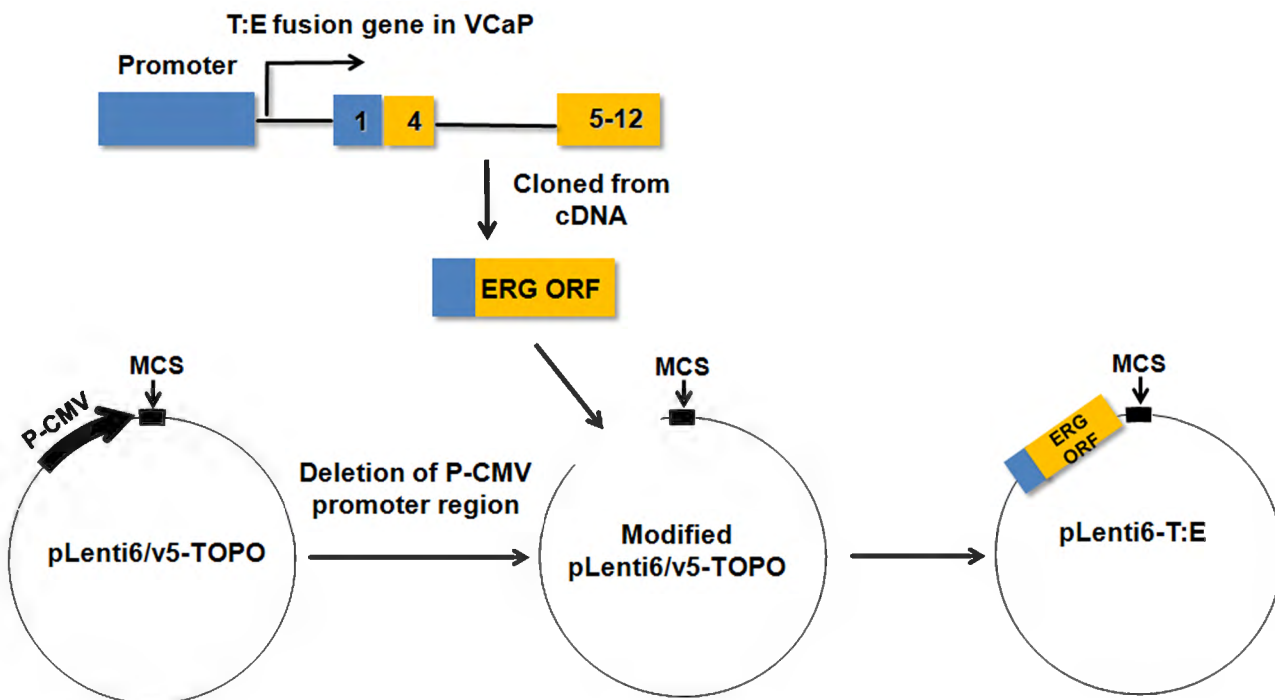**c**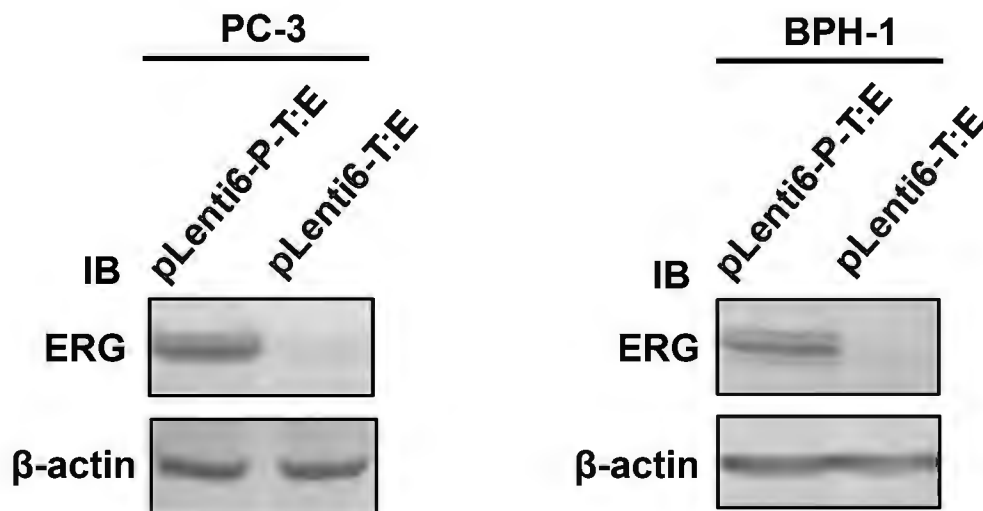

**Supplementary Figure S8**



**a**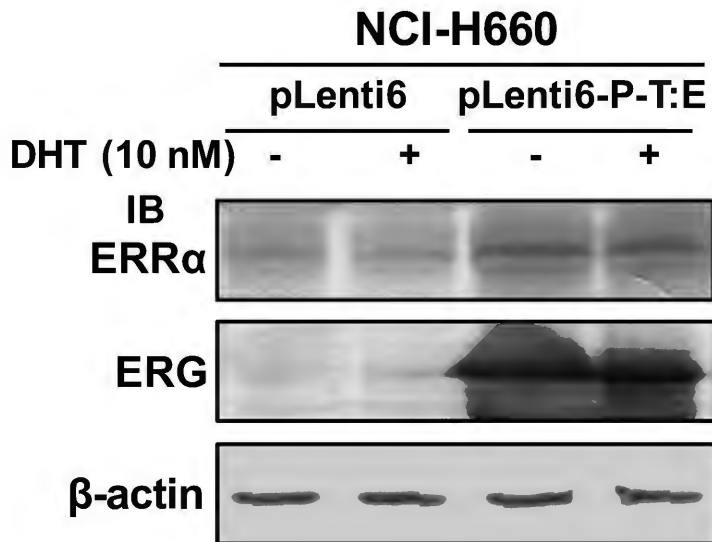**b**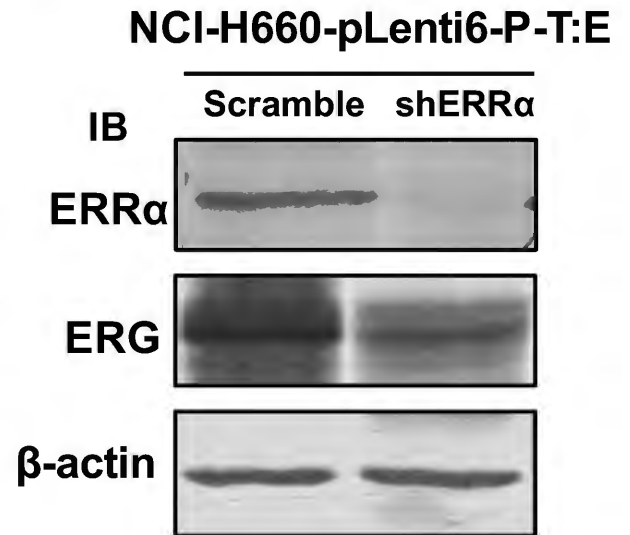**c**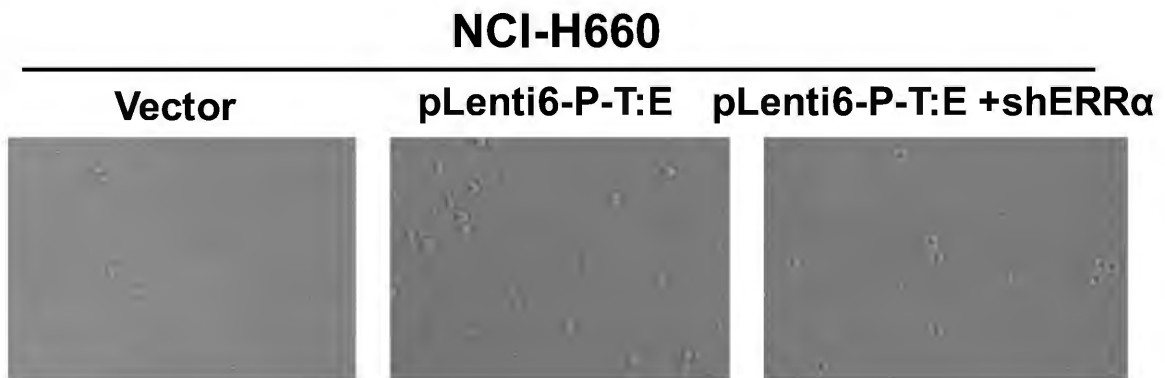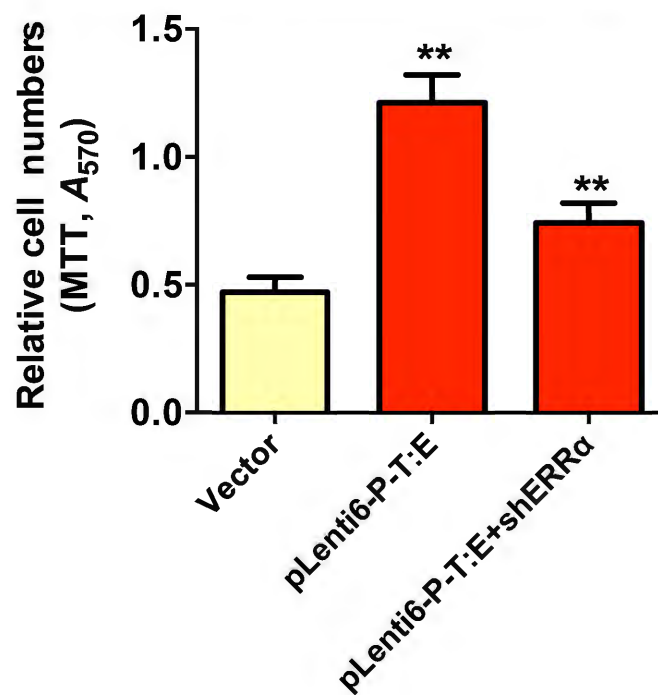**Supplementary Figure S9**

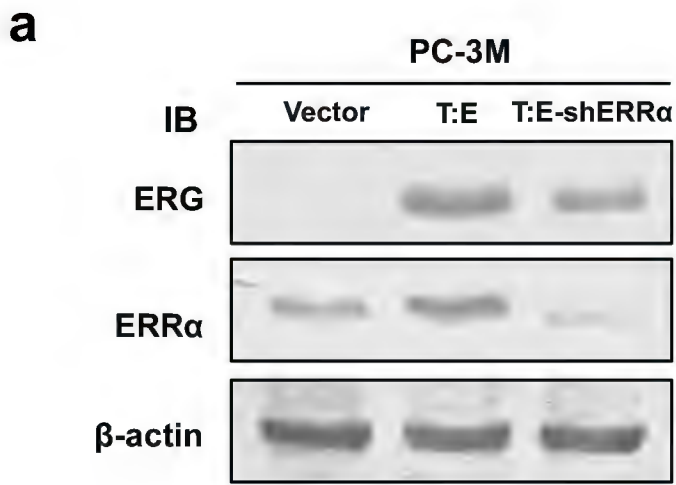

**b**

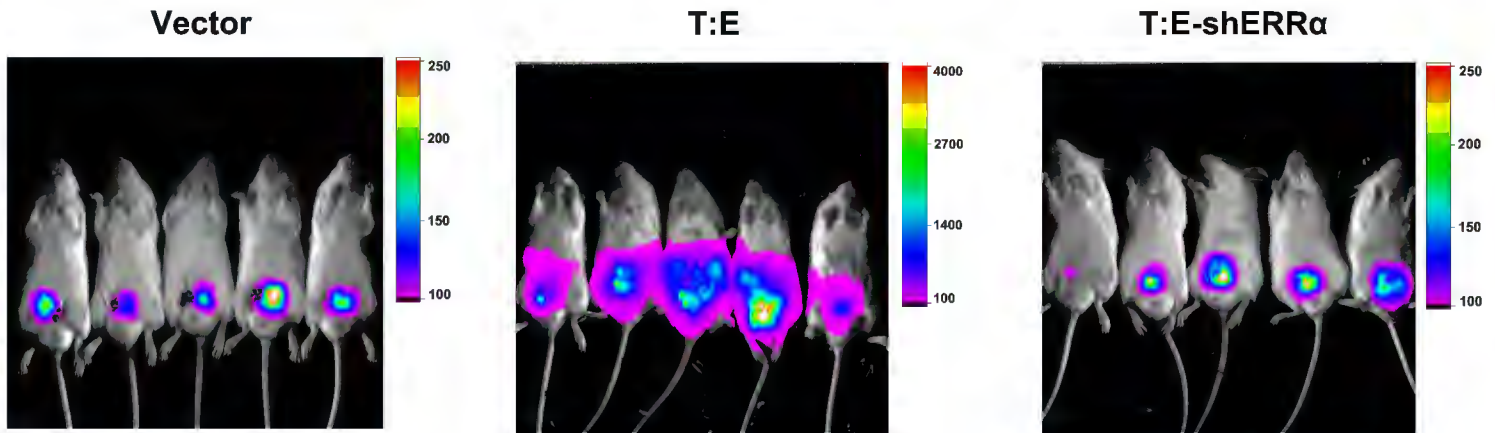

**c**

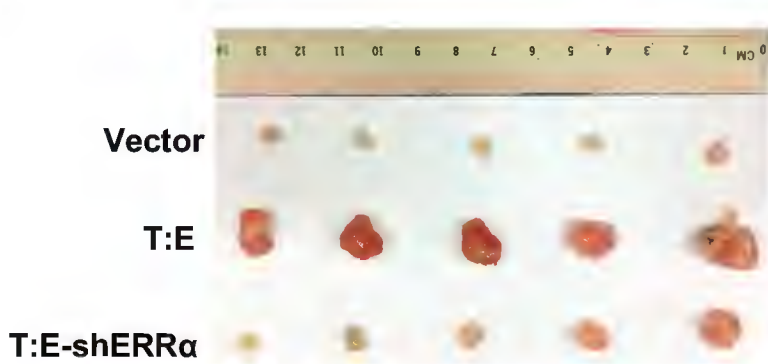

**d**

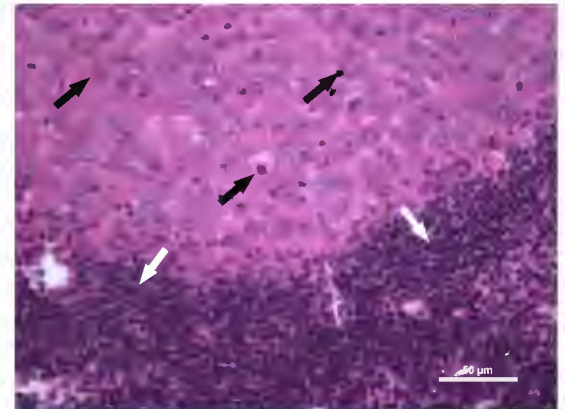

**e**

|                             | PC-3M-vector<br>n = 5 | PC-3M-T:E<br>n = 5 | PC-3M-T:E-shERR $\alpha$<br>n = 5 |
|-----------------------------|-----------------------|--------------------|-----------------------------------|
| Mean tumor weight (mg)**    | 48.3 $\pm$ 13.1       | 564.6 $\pm$ 154.3  | 170.5 $\pm$ 156.2                 |
| Lymph node metastasis (n)** | 1/5                   | 5/5                | 2/5                               |

**Supplementary Figure S10**

**a**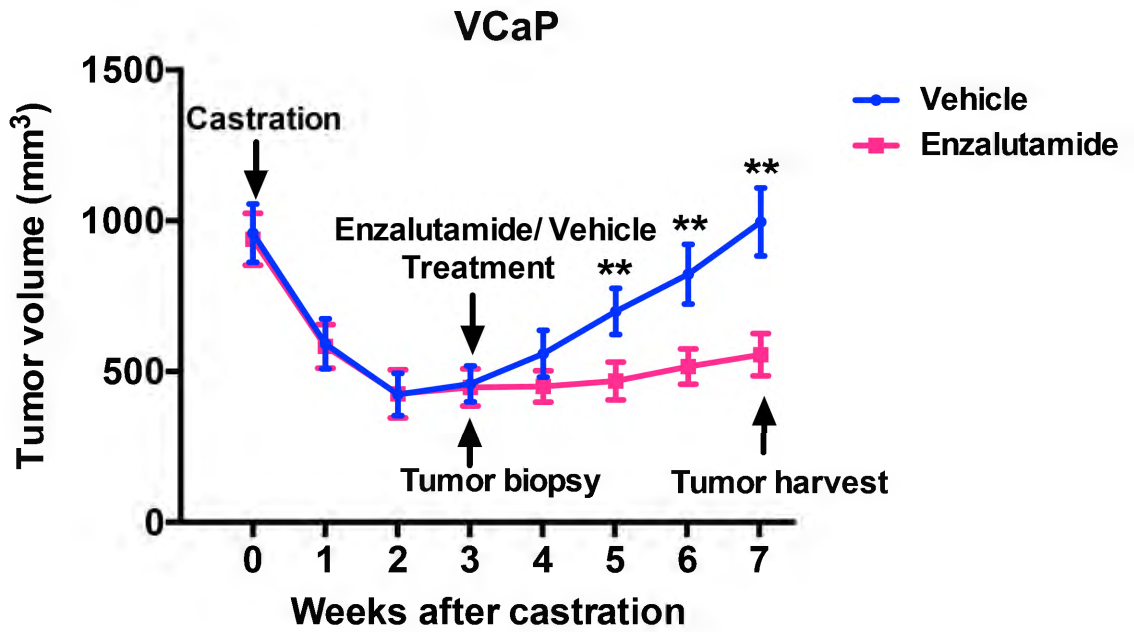**b**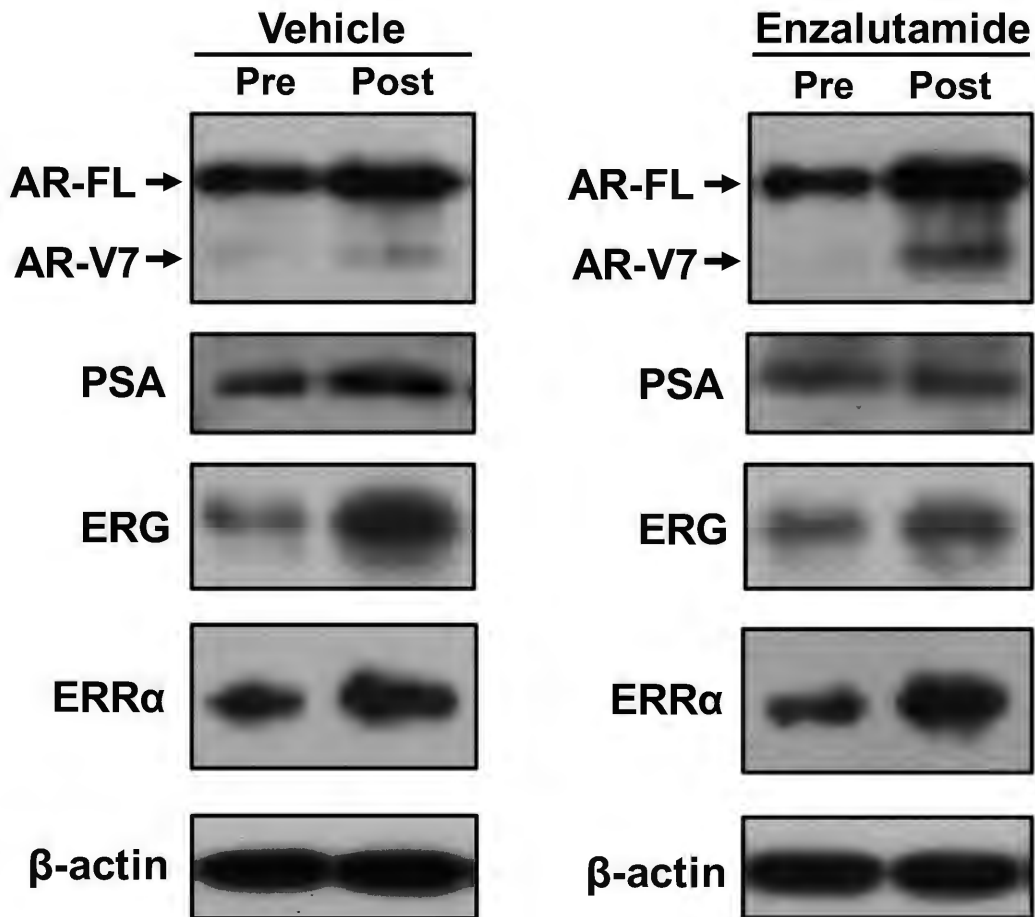**Supplementary Figure S11**

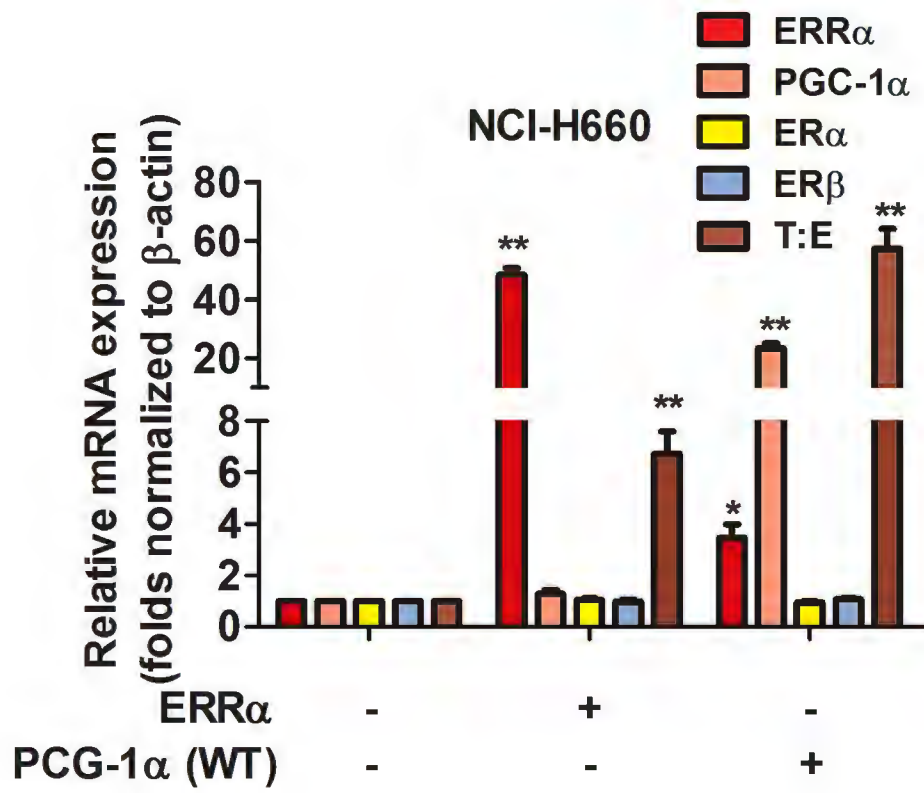

**Supplementary Figure S12**
