# Supplementary material for: Nuclear receptor ERRα and transcription factor ERG form a reciprocal loop in the regulation of TMPRSS2:ERG fusion gene in prostate cancer
Source: PubMed Central journal article supplement (PMC6265259; doi:10.1038/s41388-018-0409-7), 2018-07-24
Supplement: 41388_2018_409_MOESM2_ESM.pdf [file 41388_2018_409_MOESM2_ESM.pdf]

# **Nuclear receptor $ERR\alpha$ and transcription factor ERG form a reciprocal loop in the regulation of *TMPRSS2:ERG* fusion gene in prostate cancer**

Zhenyu Xu, Yuliang Wang, Zhan Gang Xiao, Chang Zou, Xian Zhang, Zhu Wang, Dinglan Wu, Shan Yu, and Franky Leung Chan

## **Supplementary Figure Legends**

**Supplementary Figure S1.** Pearson correlation and linear regression analysis between  $ERR\alpha$  and ERG expression in primary prostate cancer samples (TCGA, Provisional). Results showed that mRNA levels of both  $ERR\alpha$  and ERG displayed a positive correlation in subsets of prostate cancer patients with either (a)  $AR^{low}$  or (b)  $AR^{high}$  expressions (high and low are defined by median value of AR mRNA level). (c) Expression profile of  $ERR\alpha$  in primary and metastatic prostate cancer as revealed from a GEO dataset (GSE21032). Results showed that the  $ERR\alpha$  mRNA level exhibited a significant increase in metastatic prostate cancer tissues as compared to primary tumors. \*,  $P < 0.05$ ; \*\*\*,  $P < 0.001$ .

**Supplementary Figure S2.** Treatment with XCT790 induces reduction of protein levels of both ERG and  $ERR\alpha$  in prostate cancer cells. (a) RT-qPCR and (b) immunoblot analyses of T:E fusion or ERG and  $ERR\alpha$  in VCaP cells upon treatment with low-dose XCT790 (1  $\mu$ M) for a time course of 1-5 days. Result of RT-qPCR showed that XCT790 treatment could induce a time-dependent decrease of mRNA levels of T:E fusion but not  $ERR\alpha$  in VCaP cells. However, immunoblot results revealed that protein levels of both ERG and  $ERR\alpha$  were decreased in XCT790-treated VCaP cells in a time-dependent manner. (c) Treatments of VCaP cells with XCT790 and a proteasome inhibitor MG132. Immunoblot results showed that the decrease of  $ERR\alpha$  protein expression in XCT790-treated VCaP cells could be prevented by MG132. (d and e) RT-qPCR analysis of *TMPRSS2* gene expression in AR-positive prostate cancer cells upon XCT790 treatment. Results showed that XCT790 could dose-dependently

suppress the endogenous *TMPRSS2* expression in T:E-positive VCaP and T:E-negative LNCaP cells. \*,  $P < 0.05$ ; \*\*,  $P < 0.01$  versus vehicle treatment.

**Supplementary Figure S3.** (a and b) Stable knockdown of  $ERR\alpha$  induced significant suppressions of multiple  $ERR\alpha$  target genes (*ACADM*, *APOA4*, *IDH3A* and *SLC25A4*) in both VCaP and LNCaP cells. (c) siRNA Knockdown of  $ERR\gamma$  induced no change in T:E fusion expression in VCaP cells as analyzed by RT-qPCR. \*,  $P < 0.05$ ; \*\*,  $P < 0.01$  versus sh/siScramble constructs.

**Supplementary Figure S4.** Inhibition of  $ERR\alpha$  activity or its knockdown induces no change in expressions of ERG-responsive targets in T:E-negative LNCaP cells, and also induces no change in AR expression in T:E-positive VCaP cells. (a and b) RT-qPCR analysis showed that the mRNA expressions of ERG-responsive targets exhibited no changes in T:E-negative LNCaP cells upon XCT790 (10  $\mu$ M) or sh $ERR\alpha$  treatment. (c and d) Similarly, XCT790 treatment and  $ERR\alpha$  knockdown induced no change in AR levels in VCaP cells. Data are presented as mean  $\pm$  SEM obtained from three independent experiments. \*,  $P < 0.05$ ; \*\*,  $P < 0.01$  versus vehicle treatment or Scramble shRNA, 2-tailed Student's *t* test.

**Supplementary Figure S5.** Suppression of T:E fusion gene expression in VCaP cells by XCT790 treatment, with further suppression by co-treatments with non-steroidal antiandrogen (flutamide or enzalutamide) or siRNA knockdown of AR as analyzed by RT-qPCR. (a and b) XCT790 and antiandrogen treatments. Results showed that single treatment with either XCT790 or antiandrogen (flutamide or enzalutamide) could suppress the T:E fusion expression in VCaP cells stimulated or unstimulated with AR agonist R1881 or DHT. Results also revealed that combined treatments with XCT790 and antiandrogen could synergistically suppress the T:E expression in R1881/DHT-treated and untreated VCaP cells. (c) Immunoblot validation of decreased AR (both AR-FL and AR-V7) levels in siAR-transfected VCaP cells. (d) XCT790 and siAR treatments. Similarly, suppression of T:E expression was detected in VCaP cells

treated singly with XCT790 or siAR and with further suppression by combined XCT790-siAR treatment. (e) AR expression. XCT790 treatment induced no change in AR expression in VCaP cells treated or untreated with DHT. \*,  $P < 0.05$  versus vehicle or siScramble.

**Supplementary Figure S6.** Suppression of  $ERR\alpha$ -induced transactivation of T:E-I/II/III-Luc reporters by XCT790. (a) ChIP assay of T:E fusion gene performed in AR-negative NCI-H660 cells. Results showed that only the P3 site located at -5 kb upstream of the transcription start site of T:E fusion gene was enriched of  $ERR\alpha$ . (b-g) Luciferase reporter assays of T:E fusion gene regulatory regions performed in  $ERR\alpha$ -transfected HEK293 cells. (b-d) All three T:E-Luc-I/II/III-Luc reporter constructs, driven by different lengths of T:E promoter/enhancer fragments, could be dose-dependently transactivated by the transfected  $ERR\alpha$ . But their transactivations were attenuated by XCT70. (e-g) ARE-containing T:E-Luc-I/III-Luc reporter constructs but not the ERRE-containing T:E-Luc-II could be further potentiated by co-transfection with AR. \*,  $P < 0.05$ ; \*\*,  $P < 0.01$  versus vehicle control.

**Supplementary Figure S7.** (a-c) ChIP assays of the regulatory regions of T:E fusion gene performed in AR-positive VCaP cells. a and b: results showed that the binding of  $ERR\alpha$  to the three regulatory sites (P1, P3 and P6) at the promoter and enhancer regions of T:E fusion gene was not affected by AR knockdown (siAR) or its inhibition (enzalutamide). c: results also showed that inhibition of  $ERR\alpha$  by XCT790 did not affect the binding of AR to ARE-containing P1 and P6 sites in the presence of DHT. (d) ChIP-3C assay of T:E fusion gene enhancer region performed in VCaP cells upon treatments with XCT790, enzalutamide or siAR. Left panel: schematic diagram shows the locations of the *EcoRI* cut sites (indicated by arrows) and the primers designed for ChIP-3C assay at the enhancer (-14kb – -12k upstream) and promoter regions of T:E fusion gene. F1, F2, designed enhancer primers at the enhancer region; R, designed anchor primer at the promoter region. Right panel: results showed that a PCR product was only amplified using the R anchor primer and the F1 enhancer primer but not the

F2 enhancer primer in the re-ligated chromatin and its amplification signal was significantly reduced in VCaP cells treated with XCT790 but unaffected by enzalutamide or siAR. Synthesized T:E promoter fragments (-1 bp--1.4 kb; 100 µg) were used as positive control to validate the F1 and F2 primers.

**Supplementary Figure S8.** Generation of T:E fusion infectants in ERG-negative prostatic cells (PC-3 and BPH-1) by the promoter-less pLenti-T:E plasmid. **(a)** Immunoblots of AR and ERG. Parental VCaP prostate cancer cells showed positive AR and ERG expressions, whereas parental PC-3 prostate cancer cells and BPH-1 immortalized prostatic epithelial cells showed absence of AR and ERG expression. **(b)** Schematic diagram shows the construction of the promoter-less lentiviral plasmid pLenti6-T:E. The pLenti6-T:E was generated by insertion of only the cDNA of the full-length open reading frame (ORF) of the T:E fusion gene (i.e. ERG) without its promoter into the CMV promoter-deleted pLenti6-V5-TOPO as the pLenti6-T:E. **(c)** Immunoblot analysis of ERG. Only the PC-3 and BPH-1 infectants generated by the pLenti6-P-T:E containing the T:E promoter expressed ERG expression, but not by the T:E promoter-less pLenti6-T:E.

**Supplementary Figure S9.** **(a)** Generation of T:E infectants in AR-negative and T:E-positive NCI-H660 prostate cancer cells. The NCI-H660-T:E infectants expressed significant higher levels of  $ERR\alpha$  and ERG than their empty vector-infectants, with no changes in their levels upon DHT stimulation. **(b)** shRNA Knockdown of  $ERR\alpha$  induced decreased expression of ERG in NCI-H660-T:E infectants as shown by immunoblot analysis. **(c)** Transwell invasion assay on NCI-H660-T:E infectants. Upper panel: representative images of invading free-floating NCI-H660 infectants. Magnification,  $\times 100$ . Lower panel: quantification of the relative cell numbers of invading cells by MTT assay. Results showed that the NCI-H660-T:E infectants exhibited higher invasion capacity than their empty vector and T:E-sh $ERR\alpha$  infectants. \*\*,  $P < 0.01$  versus empty vector or T:E-sh $ERR\alpha$  infectants.

**Supplementary Figure S10.** Ectopic T:E fusion expression promotes *in vivo* tumor growth and lymph node metastasis of PC-3M prostate cancer cells, whereas knockdown of endogenous  $ERR\alpha$  suppresses their T:E-induced *in vivo* malignant growth capacities. **(a)** Immunoblot validation of ERG and  $ERR\alpha$  expressions in T:E fusion stable infectants of PC-3M cells with or without shRNA knockdown of  $ERR\alpha$ . Results validated that ERG was expressed in PC-3M-T:E infectants and its level was significantly reduced upon  $ERR\alpha$  knockdown in PC-3M-T:E-sh $ERR\alpha$  infectants. **(b)** Bioluminescence *in vivo* imaging. Representative bioluminescent images of mice at 6<sup>th</sup>-week post-intraprostatic inoculation of PC-3M-vector/Luc<sup>+</sup>, PC-3M-T:E/Luc<sup>+</sup> or PC-3M-T:E-sh $ERR\alpha$ /Luc<sup>+</sup> infectants. Significant enhanced tumor growth was detected in the mouse prostate receiving orthotopic inoculation of PC-3M-T:E/Luc<sup>+</sup> infectants, as revealed by their higher intense bioluminescent signals, as compared to mice receiving orthotopic inoculation of vector counterpart PC-3M-vector/Luc<sup>+</sup> infectants. Significant reduction of bioluminescent signals of prostate tumors was also detected in mice receiving inoculation of PC-3M-T:E-sh $ERR\alpha$  infectants with stable  $ERR\alpha$  knockdown, as compared to mice receiving PC-3M-T:E/Luc<sup>+</sup> infectants. Scale bars show the color intensity map for the bioluminescent signals expressed as photon counts. **(c)** Photograph shows the dissected prostate tumors formed by the inoculated PC-3M-vector/Luc<sup>+</sup>, PC-3M-T:E/Luc<sup>+</sup> or PC-3M-T:E-sh $ERR\alpha$ /Luc<sup>+</sup> infectants. PC-3M-T:E/Luc<sup>+</sup> infectants formed significant larger tumors in host mice than the PC-3M-vector/Luc<sup>+</sup> or PC-3M-T:E-sh $ERR\alpha$  infectants. **(d)** Representative H&E micrograph of aortic lymph node with prostate cancer metastasis in mice receiving inoculation of PC-3M-T:E/Luc<sup>+</sup> infectants. Black arrows indicate the metastasizing prostate cancer cells and white arrows indicate the lymphocytes in lymph node. Magnification,  $\times 400$ ; bar, 50  $\mu\text{m}$ . **(e)** Table summarizes the results of prostate tumor weights and lymph node metastasis detected in mice inoculated with PC-3M-vector/Luc<sup>+</sup>, PC-3M-T:E/Luc<sup>+</sup> or PC-3M-T:E-sh $ERR\alpha$ /Luc<sup>+</sup> infectants. \*\*,  $P < 0.01$  versus PC-3M-T:E/Luc<sup>+</sup> infectants.

**Supplementary Figure S11.** Enzalutamide treatment of castrated host mice bearing VCaP-CRPC xenograft tumors induces further expressions of AR and ERR $\alpha$ . **(a)** Growth curve of VCaP xenograft tumors in castrated host mice upon enzalutamide or vehicle treatment. Once the VCaP-CRPC tumors showed rebound growth at 2<sup>nd</sup>-3<sup>rd</sup> week post-castration, tumor bearing mice were randomly assigned to daily oral gavage with enzalutamide (10 mg/kg) or vehicle (1% carboxymethyl cellulose, 0.1% Tween-80 and 5% DMSO in distilled water) for additional 4 weeks ( $n = 5$ ). Results showed that enzalutamide treatment could significantly retard the castration-relapse growth of VCaP-CRPC tumors as compared to vehicle. **(b)** Immunoblot analysis of AR (full-length AR-FL and spliced variant AR-V7), PSA, ERG and ERR $\alpha$  in VCaP-CRPC tumors upon enzalutamide or vehicle treatment. Results showed that protein levels of AR-FL, AR-V7, PSA, ERG and ERR $\alpha$  showed significant increases in VCaP-CRPC tumors at 4<sup>th</sup>-week post-treatment (Post) with vehicle as compared to that at pre-treatment (Pre). Enzalutamide treatment (Post) could further increase expressions of AR-FL, AR-V7 and ERR $\alpha$  and moderately increase ERG but attenuate PSA up-regulation in VCaP-CRPC tumors.

**Supplementary Figure S12.** ERR $\alpha$  overexpression induces no change in ER $\alpha$  and ER $\beta$  expressions in ERG-positive and AR-negative NCI-H660 cells. RT-qPCR analysis showed that transfection of co-regulator PGC-1 $\alpha$  could significantly up-regulate the expressions of ERR $\alpha$  and T:E fusion but not ER $\alpha$  and ER $\beta$  in NCI-H660 cells, and ERR $\alpha$  transfection induced no changes in mRNA levels of PGC-1 $\alpha$ , ER $\alpha$  and ER $\beta$  in NCI-H660 cells. \*,  $P < 0.05$ ; \*\*,  $P < 0.01$  versus empty vector control.
