# Supplementary material for: Nuclear receptor ERRα and transcription factor ERG form a reciprocal loop in the regulation of TMPRSS2:ERG fusion gene in prostate cancer
Source: PubMed Central journal article supplement (PMC6265259; doi:10.1038/s41388-018-0409-7), 2018-07-24
Supplement: 41388_2018_409_MOESM3_ESM.pdf [file 41388_2018_409_MOESM3_ESM.pdf]

**Nuclear receptor  $ERR\alpha$  and transcription factor ERG form a reciprocal loop in the regulation of *TMPRSS2:ERG* fusion gene in prostate cancer**

Zhenyu Xu, Yuliang Wang, Zhan Gang Xiao, Chang Zou, Xian Zhang, Zhu Wang, Dinglan

Wu, Shan Yu, and Franky Leung Chan

**Supplementary Table S1 Information of primers**

| <b>Primer name</b>     | <b>Nucleotide sequences</b>           |
|------------------------|---------------------------------------|
| ACTB ( $\beta$ -actin) | Forward<br>ATGGATGATGATATCGCCGCG      |
|                        | Reverse<br>CTCCATGTCGTCCCAGTTGGT      |
| TMPRSS2:ERG<br>(T:E)   | Forward<br>TAGGCGCGAGCTAAGCAGGAG      |
|                        | Reverse<br>GTAGGCACACTCAAACAACGACTGG  |
| CRISP3                 | Forward<br>CACAATGAACTGAGGAGAGCAGTATC |
|                        | Reverse<br>TGTCTGTAATTGCACTGGTTTGC    |
| MMP1                   | Forward<br>TTTCATTTCTGTTTTCTGGCCA     |
|                        | Reverse<br>CATCTCTGTCGGCAAATTCGT      |
| PLAT                   | Forward<br>CACTGGGCCTGGGCAAACATA      |
|                        | Reverse<br>CACGTCAGCCTGCGGTTCTTC      |
| PLA1A                  | Forward<br>CCACCCACAATGCCAGATAAAC     |
|                        | Reverse<br>TCCCAATAATGGTAGTCCGGTCTTTT |
| ESRRA ( $ERR\alpha$ )  | Forward<br>GTCCAAAGGGTTCCTCGGAG       |
|                        | Reverse<br>GGATGCCACACCATAGTGGTA      |

|             |                                      |
|-------------|--------------------------------------|
| TMPRSS2     | Forward<br>CAGGAGTGTACGGGAATGTGATGGT |
|             | Reverse<br>GATTAGCCGTCTGCCCTCATTGT   |
| AR          | Forward<br>ATCTTGTCCACCGTGTGTCT      |
|             | Reverse<br>AGCCCTAACTGCACTTCCAT      |
| ACADM       | Forward<br>AGAACCTGGAGCAGGCTCTGAT    |
|             | Reverse<br>AGAACCTGGAGCAGGCTCTGAT    |
| APOA4       | Forward<br>CACGGTGATGTGGGACTACTTC    |
|             | Reverse<br>CCAAGTTTGTCTGGAAGAGGG     |
| IDH3A       | Forward<br>TCGGTGTGACACCAAGTGGCAA    |
|             | Reverse<br>TTCGCCATGTCCTTGCCTGCAA    |
| SLC25A4     | Forward<br>GCTGCCTACTTCGGAGTCTATG    |
|             | Reverse<br>TGCGACTGCCGTCACACTCTG     |
| ChIP-T:E-P1 | Forward<br>TGGTCCTGGATGATAAAAAA      |
|             | Reverse<br>CAGGGAGACATACGCCCCAC      |
| ChIP-T:E-P2 | Forward<br>GAAACATGGATCAAAGGTG       |
|             | Reverse<br>CCTCACATTTCAATCTTCCT      |
| ChIP-T:E-P3 | Forward<br>GATGAAAGGAGTTTGTAGCCC     |
|             | Reverse<br>ATGGGGATTCTGCCAGCTGC      |
| ChIP-T:E-P4 | Forward<br>TTAGTAGAGACGGGGTTTCA      |
|             | Reverse<br>AGTGGCTCACACCTGTAATC      |
| ChIP-T:E-P5 | Forward<br>GGACTACCAAGGAGAAGCTA      |
|             | Reverse<br>ATTAATAGCCCTGCCTGGAT      |

|                       |                                                                                |
|-----------------------|--------------------------------------------------------------------------------|
| ChIP-T:E-P6           | Forward<br>TTCTGAGCCCCACAATTGC                                                 |
|                       | Reverse<br>GTGGTGGGACACACCTCAGC                                                |
| ChIP-ERR $\alpha$ -P1 | Forward<br>TGGGAGTGGGGATTGTTGGT                                                |
|                       | Reverse<br>ATAGCAGAACACGAACGTGG                                                |
| ChIP-ERR $\alpha$ -P2 | Forward<br>GGCCGCAACATTAGCAAGAC                                                |
|                       | Reverse<br>ATTGATTTCATGGAGCTGC                                                 |
| ChIP-ERR $\alpha$ -P3 | Forward<br>AAGCCAGGGTTGTAACCTC                                                 |
|                       | Reverse<br>CGCAGACTCCTGGGCCTTCC                                                |
| ChIP-ERR $\alpha$ -P4 | Forward<br>TCGGTCACCGCATGGACCTT                                                |
|                       | Reverse<br>GCTGCGGAACTCGGGGTGGG                                                |
| 3C-R                  | AGGAAGACGTGGCTGTTCC                                                            |
| 3C-F1                 | ACACAGCAAGGCAGAGGACA                                                           |
| 3C-F2                 | CCAGTCTGTGGTATTCTGTA                                                           |
| pLKO-sh-T:E-#1        | Forward<br>CCGGTGACATCCTTCTCTCACATCTCG<br>AGATGTGAGAGAAGGATGTCTTTTTG           |
|                       | Reverse<br>AATTCAAAAAGACATCCTTCTCTCACA<br>TCTCGAGATGTGAGAGAAGGATGTCA           |
| pLKO-sh-T:E-#2        | Forward<br>CCGGTGCCCATCAACAGACGTTGATAC<br>TCGAGTATCAACGTCTGTTGATGGGCT<br>TTTTG |
|                       | Reverse<br>AATTCAAAAAGCCCATCAACAGACGT<br>TGATACTCGAGTATCAACGTCTGTTGA<br>TGGGCA |
| siAR                  | CAAGGGAGGTTACACCAA                                                             |

|                               |                                              |
|-------------------------------|----------------------------------------------|
| siERR $\gamma$ -#1            | AATGGCCATCAGAACGGACTT                        |
| siERR $\gamma$ -#2            | AACTTGTCTATGCAGACGATT                        |
| pGL3-T:E(-13kb,I)             | Forward<br>GCCTTGTGACACTTCACCCATCTTTGA<br>CA |
|                               | Reverse<br>GCTGTTCTGCTCCCATCTGTCCCCA         |
| pGL3-T:E(-13kb,I)-deletion    | Forward<br>ACAGCAAGGCGCACTCTGTTGTGGGG<br>CG  |
|                               | Reverse<br>CGCCCCACAACAGAGTGCGCCTTGCT<br>GT  |
| pGL3-T:E(-5000bp,II)          | Forward<br>CTGGATAGTCAGGGACTTGGAAGA          |
|                               | Reverse<br>TCCATGAGCCCATTGGGTGATGACAG        |
| pGL3-T:E(-5000bp,II)-deletion | Forward<br>CAGGCTGGTCTTGAACCTCCACCGAC<br>CT  |
|                               | Reverse<br>AGGTTCGGTGGAGGTTCAAGACCAGCC<br>TG |
| pGL3-T:E(-2000bp,III)         | Forward<br>CACTCCAAGAGGCCTGAGTC              |
|                               | Reverse<br>CGGCCCGCCCTGGCTCTCGCTTTA          |
| pGL3-T:E(-1000bp, III)        | Forward<br>GGAGAGGAGGTGTCTGGTGA              |
|                               | Reverse<br>CGGCCCGCCCTGGCTCTCGCTTTA          |
| pGL3-T:E(-300bp)              | Forward<br>ATCCCCTCCTTAACCCAAA               |
|                               | Reverse<br>CGGCCCGCCCTGGCTCTCGCTTTA          |
| pGL3-ERR $\alpha$ (-600bp)    | Forward<br>ATCGGCTGGGACCACTTCCTGACT          |
|                               | Reverse<br>CGCGCGAGAGGAGTGGGCGAGGCGG<br>TG   |

|                                     |                                                    |
|-------------------------------------|----------------------------------------------------|
| pGL3-ERR $\alpha$ (-600bp)-deletion | Forward<br>CCTATCGGCCCTACTCGAATCCAGGAC             |
|                                     | Reverse<br>GTCCTGGATTTCGAGTAGGGCCGATAGG            |
| pcDNA3-T:E                          | Forward<br>CGCGAGCTAAGCAGGAGGC                     |
|                                     | Reverse<br>CCTCCGCCAGGTCTTTAGTA                    |
| pLenti6-P-T:E-promoter              | Forward<br>CACTCCAAGAGGCCTGAGTC                    |
|                                     | Reverse<br>CGGCCCGCCCTGGCTCTCGCTTTA                |
| pLenti6-P-T:E-cDNA                  | Forward<br>CGCGAGCTAAGCAGGAGGC                     |
|                                     | Reverse<br>CCTCCGCCAGGTCTTTAGTA                    |
| pLenti6-P-T:E-fusion                | Forward<br>AGGGCGGGCCGGGCCGGACTAGTCGC<br>GAGCTAAGC |
|                                     | Reverse<br>GCTTAGCTCGCGACTAGTCCGGCCCG<br>GCCCGCCCT |
